# Supplementary material for: Regional Yield Estimation for Sugarcane Using MODIS and Weather Data: A Case Study in Florida and Louisiana, United States of America
Source: MDPI journal article supplement (doi:10.3390/rs14163870), 2022-08-10
Supplement: s1 [file s1]

**Table S1.** State- and county-level statistical data from NASS. In state-level data, the F and L following the county name represent Florida and Louisiana states, respectively.

| State-level data  |               |            |              |                 |
|-------------------|---------------|------------|--------------|-----------------|
| Year              | State         | Area (kha) | Yield (t/ha) | Production (mt) |
| 2008              | Florida       | 162.28     | 81.68        | 13.26           |
| 2009              | Florida       | 156.61     | 89.00        | 13.94           |
| 2010              | Florida       | 158.64     | 81.77        | 12.97           |
| 2011              | Florida       | 160.66     | 92.93        | 14.93           |
| 2012              | Florida       | 167.14     | 91.06        | 15.22           |
| 2013              | Florida       | 168.35     | 85.54        | 14.40           |
| 2014              | Florida       | 165.11     | 95.32        | 15.74           |
| 2015              | Florida       | 167.14     | 105.62       | 17.65           |
| 2016              | Florida       | 168.75     | 100.17       | 16.90           |
| 2008              | Louisiana     | 163.90     | 69.93        | 11.46           |
| 2009              | Louisiana     | 171.99     | 79.57        | 13.69           |
| 2010              | Louisiana     | 169.97     | 68.70        | 11.68           |
| 2011              | Louisiana     | 165.92     | 68.20        | 11.32           |
| 2012              | Louisiana     | 173.21     | 81.54        | 14.12           |
| 2013              | Louisiana     | 178.87     | 75.37        | 13.48           |
| 2014              | Louisiana     | 166.33     | 72.90        | 12.13           |
| 2015              | Louisiana     | 165.92     | 73.14        | 12.14           |
| 2016              | Louisiana     | 174.42     | 71.17        | 12.41           |
| County-level data |               |            |              |                 |
| Year              | County        | Area (kha) | Yield (t/ha) | Production (mt) |
| 2008              | GLADES(F)     | 15.38      | 88.96        | 1.368           |
| 2009              | GLADES(F)     | 14.57      | 96.37        | 1.404           |
| 2010              | GLADES(F)     | 8.90       | 69.64        | 0.62            |
| 2011              | GLADES(F)     | 9.71       | 93.69        | 0.91            |
| 2012              | GLADES(F)     | 10.20      | 91.00        | 0.928           |
| 2013              | GLADES(F)     | 9.75       | 87.26        | 0.851           |
| 2014              | GLADES(F)     | 9.31       | 94.87        | 0.883           |
| 2015              | GLADES(F)     | 9.43       | 103.72       | 0.978           |
| 2016              | GLADES(F)     | 9.71       | 100.80       | 0.979           |
| 2008              | HENDRY(F)     | 14.16      | 88.96        | 1.26            |
| 2009              | HENDRY(F)     | 13.76      | 96.37        | 1.326           |
| 2010              | HENDRY(F)     | 19.83      | 69.59        | 1.38            |
| 2011              | HENDRY(F)     | 21.04      | 91.95        | 1.935           |
| 2012              | HENDRY(F)     | 25.33      | 88.82        | 2.25            |
| 2013              | HENDRY(F)     | 26.71      | 77.05        | 2.058           |
| 2014              | HENDRY(F)     | 25.50      | 94.10        | 2.399           |
| 2015              | HENDRY(F)     | 26.30      | 103.21       | 2.715           |
| 2016              | HENDRY(F)     | 27.56      | 99.97        | 2.755           |
| 2008              | PALM BEACH(F) | 125.86     | 79.50        | 10.006          |
| 2009              | PALM BEACH(F) | 121.41     | 86.92        | 10.553          |

---

|      |               |        |        |        |
|------|---------------|--------|--------|--------|
| 2010 | PALM BEACH(F) | 119.38 | 82.59  | 9.86   |
| 2011 | PALM BEACH(F) | 120.80 | 92.72  | 11.2   |
| 2012 | PALM BEACH(F) | 120.80 | 90.69  | 10.955 |
| 2013 | PALM BEACH(F) | 120.80 | 86.08  | 10.398 |
| 2014 | PALM BEACH(F) | 118.17 | 94.86  | 11.209 |
| 2015 | PALM BEACH(F) | 118.98 | 105.28 | 12.526 |
| 2016 | PALM BEACH(F) | 118.17 | 99.32  | 11.737 |
| 2008 | ASCENSION(L)  | 6.96   | 61.06  | 0.425  |
| 2009 | ASCENSION(L)  | 5.75   | 75.70  | 0.435  |
| 2010 | ASCENSION(L)  | 5.42   | 71.00  | 0.385  |
| 2011 | ASCENSION(L)  | 5.46   | 67.73  | 0.37   |
| 2012 | ASCENSION(L)  | 7.16   | 76.23  | 0.546  |
| 2013 | ASCENSION(L)  | 7.24   | 80.76  | 0.585  |
| 2014 | ASCENSION(L)  | 5.91   | 75.32  | 0.445  |
| 2015 | ASCENSION(L)  | 5.54   | 73.95  | 0.41   |
| 2016 | ASCENSION(L)  | 4.94   | 69.88  | 0.345  |
| 2008 | ASSUMPTION(L) | 11.33  | 75.90  | 0.86   |
| 2009 | ASSUMPTION(L) | 14.81  | 86.42  | 1.28   |
| 2010 | ASSUMPTION(L) | 14.61  | 67.90  | 0.992  |
| 2011 | ASSUMPTION(L) | 14.81  | 67.72  | 1.003  |
| 2012 | ASSUMPTION(L) | 14.16  | 85.07  | 1.205  |
| 2013 | ASSUMPTION(L) | 14.73  | 73.32  | 1.08   |
| 2014 | ASSUMPTION(L) | 13.68  | 69.09  | 0.945  |
| 2015 | ASSUMPTION(L) | 14.00  | 70.35  | 0.985  |
| 2016 | ASSUMPTION(L) | 14.69  | 66.78  | 0.981  |
| 2008 | AVOYELLES(L)  | 3.52   | 68.17  | 0.24   |
| 2009 | AVOYELLES(L)  | 3.20   | 76.63  | 0.245  |
| 2010 | AVOYELLES(L)  | 3.04   | 73.14  | 0.222  |
| 2012 | AVOYELLES(L)  | 3.56   | 86.21  | 0.307  |
| 2013 | AVOYELLES(L)  | 3.56   | 77.22  | 0.275  |
| 2008 | IBERIA(L)     | 20.56  | 72.96  | 1.5    |
| 2009 | IBERIA(L)     | 20.88  | 76.62  | 1.6    |
| 2010 | IBERIA(L)     | 21.12  | 66.42  | 1.403  |
| 2011 | IBERIA(L)     | 20.56  | 64.69  | 1.33   |
| 2012 | IBERIA(L)     | 20.36  | 81.30  | 1.655  |
| 2013 | IBERIA(L)     | 20.68  | 76.16  | 1.575  |
| 2014 | IBERIA(L)     | 20.23  | 73.39  | 1.485  |
| 2015 | IBERIA(L)     | 20.56  | 72.23  | 1.485  |
| 2016 | IBERIA(L)     | 20.80  | 71.39  | 1.485  |
| 2008 | IBERVILLE(L)  | 13.11  | 72.45  | 0.95   |
| 2009 | IBERVILLE(L)  | 13.27  | 83.62  | 1.11   |
| 2010 | IBERVILLE(L)  | 13.15  | 72.84  | 0.958  |
| 2011 | IBERVILLE(L)  | 13.19  | 75.04  | 0.99   |
| 2012 | IBERVILLE(L)  | 13.19  | 87.93  | 1.16   |

---

---

|      |                  |       |       |       |
|------|------------------|-------|-------|-------|
| 2013 | IBERVILLE(L)     | 13.96 | 78.21 | 1.092 |
| 2014 | IBERVILLE(L)     | 13.56 | 75.24 | 1.02  |
| 2015 | IBERVILLE(L)     | 13.60 | 74.28 | 1.01  |
| 2016 | IBERVILLE(L)     | 13.92 | 70.68 | 0.984 |
| 2008 | LAFAYETTE(L)     | 4.65  | 76.28 | 0.355 |
| 2009 | LAFAYETTE(L)     | 4.13  | 77.52 | 0.32  |
| 2010 | LAFAYETTE(L)     | 4.57  | 62.54 | 0.286 |
| 2012 | LAFAYETTE(L)     | 4.49  | 83.04 | 0.373 |
| 2014 | LAFAYETTE(L)     | 4.29  | 73.43 | 0.315 |
| 2015 | LAFAYETTE(L)     | 4.53  | 72.81 | 0.33  |
| 2016 | LAFAYETTE(L)     | 4.09  | 70.71 | 0.289 |
| 2008 | LAFOURCHE(L)     | 8.38  | 56.11 | 0.47  |
| 2009 | LAFOURCHE(L)     | 10.68 | 81.90 | 0.875 |
| 2010 | LAFOURCHE(L)     | 10.89 | 60.90 | 0.663 |
| 2011 | LAFOURCHE(L)     | 10.93 | 66.35 | 0.725 |
| 2012 | LAFOURCHE(L)     | 11.17 | 76.55 | 0.855 |
| 2013 | LAFOURCHE(L)     | 11.13 | 69.19 | 0.77  |
| 2014 | LAFOURCHE(L)     | 10.40 | 65.38 | 0.68  |
| 2015 | LAFOURCHE(L)     | 10.04 | 70.74 | 0.71  |
| 2016 | LAFOURCHE(L)     | 10.00 | 70.03 | 0.7   |
| 2008 | POINTE COUPEE(L) | 12.26 | 61.16 | 0.75  |
| 2009 | POINTE COUPEE(L) | 12.30 | 82.91 | 1.02  |
| 2010 | POINTE COUPEE(L) | 13.35 | 83.57 | 1.116 |
| 2011 | POINTE COUPEE(L) | 14.41 | 75.80 | 1.092 |
| 2012 | POINTE COUPEE(L) | 15.58 | 89.21 | 1.39  |
| 2013 | POINTE COUPEE(L) | 16.27 | 80.83 | 1.315 |
| 2014 | POINTE COUPEE(L) | 14.61 | 75.64 | 1.105 |
| 2015 | POINTE COUPEE(L) | 14.49 | 76.48 | 1.108 |
| 2016 | POINTE COUPEE(L) | 17.40 | 73.27 | 1.275 |
| 2008 | RAPIDES(L)       | 4.13  | 79.95 | 0.33  |
| 2009 | RAPIDES(L)       | 3.60  | 81.91 | 0.295 |
| 2010 | RAPIDES(L)       | 3.64  | 79.07 | 0.288 |
| 2011 | RAPIDES(L)       | 3.76  | 72.27 | 0.272 |
| 2012 | RAPIDES(L)       | 4.29  | 90.92 | 0.39  |
| 2013 | RAPIDES(L)       | 4.13  | 75.10 | 0.31  |
| 2014 | RAPIDES(L)       | 3.68  | 77.39 | 0.285 |
| 2015 | RAPIDES(L)       | 3.84  | 76.73 | 0.295 |
| 2016 | RAPIDES(L)       | 4.29  | 82.76 | 0.355 |
| 2008 | SAINT JAMES(L)   | 10.64 | 73.29 | 0.78  |
| 2009 | SAINT JAMES(L)   | 9.55  | 89.00 | 0.85  |
| 2010 | SAINT JAMES(L)   | 9.63  | 68.63 | 0.661 |
| 2011 | SAINT JAMES(L)   | 9.35  | 66.32 | 0.62  |
| 2012 | SAINT JAMES(L)   | 10.76 | 77.94 | 0.839 |
| 2013 | SAINT JAMES(L)   | 10.12 | 72.65 | 0.735 |

---

---

|      |                         |       |       |       |
|------|-------------------------|-------|-------|-------|
| 2014 | SAINT JAMES(L)          | 9.75  | 70.75 | 0.69  |
| 2015 | SAINT JAMES(L)          | 9.51  | 70.35 | 0.669 |
| 2016 | SAINT JAMES(L)          | 9.87  | 68.87 | 0.68  |
| 2016 | SAINT LANDRY(L)         | 2.51  | 68.15 | 0.171 |
| 2008 | SAINT MARTIN(L)         | 11.86 | 65.36 | 0.775 |
| 2009 | SAINT MARTIN(L)         | 11.53 | 74.13 | 0.855 |
| 2010 | SAINT MARTIN(L)         | 10.48 | 65.16 | 0.683 |
| 2012 | SAINT MARTIN(L)         | 11.13 | 77.01 | 0.857 |
| 2014 | SAINT MARTIN(L)         | 11.25 | 73.33 | 0.825 |
| 2015 | SAINT MARTIN(L)         | 11.05 | 72.41 | 0.8   |
| 2016 | SAINT MARTIN(L)         | 11.29 | 67.40 | 0.761 |
| 2008 | SAINT MARY(L)           | 16.79 | 73.83 | 1.24  |
| 2009 | SAINT MARY(L)           | 17.52 | 75.62 | 1.325 |
| 2010 | SAINT MARY(L)           | 17.00 | 61.95 | 1.053 |
| 2011 | SAINT MARY(L)           | 16.59 | 68.41 | 1.135 |
| 2012 | SAINT MARY(L)           | 17.81 | 78.06 | 1.39  |
| 2013 | SAINT MARY(L)           | 17.68 | 75.77 | 1.34  |
| 2014 | SAINT MARY(L)           | 17.36 | 73.44 | 1.275 |
| 2015 | SAINT MARY(L)           | 16.92 | 73.30 | 1.24  |
| 2016 | SAINT MARY(L)           | 16.96 | 74.60 | 1.265 |
| 2009 | ST. JOHN THE BAPTIST(L) | 2.99  | 88.49 | 0.265 |
| 2008 | TERREBONNE(L)           | 3.24  | 74.13 | 0.24  |
| 2010 | TERREBONNE(L)           | 3.36  | 62.52 | 0.21  |
| 2011 | TERREBONNE(L)           | 3.44  | 61.05 | 0.21  |
| 2008 | VERMILION(L)            | 11.90 | 63.46 | 0.755 |
| 2009 | VERMILION(L)            | 11.57 | 71.71 | 0.83  |
| 2008 | WEST BATON ROUGE(L)     | 5.42  | 82.98 | 0.45  |
| 2009 | WEST BATON ROUGE(L)     | 5.26  | 82.69 | 0.435 |
| 2010 | WEST BATON ROUGE(L)     | 5.22  | 70.49 | 0.368 |
| 2011 | WEST BATON ROUGE(L)     | 5.26  | 71.09 | 0.374 |
| 2012 | WEST BATON ROUGE(L)     | 5.46  | 85.11 | 0.465 |
| 2013 | WEST BATON ROUGE(L)     | 5.58  | 76.10 | 0.425 |
| 2014 | WEST BATON ROUGE(L)     | 5.26  | 75.08 | 0.395 |
| 2015 | WEST BATON ROUGE(L)     | 5.30  | 75.45 | 0.4   |

---
